# Supplementary material for: Antiproliferative Activity of a New Quinazolin-4(3H)-One Derivative via Targeting Aurora Kinase A in Non-Small Cell Lung Cancer
Source: MDPI journal article supplement (doi:10.3390/ph15060698), 2022-06-02
Supplement: s1 [file s1]

# **Antiproliferative Activity of a New Quinazolin-4(3H)-One Derivative via Targeting Aurora Kinase A in Non-Small Cell Lung Cancer**

Ji Yun Lee <sup>1</sup>, Huarong Yang <sup>2</sup>, Donghwa Kim <sup>1</sup>, Kay Zin Kyaw <sup>1</sup>, Ruoci Hu <sup>1</sup>, Yanhua Fan <sup>2,3,\*</sup> and Sang Kook Lee <sup>1,\*</sup>

<sup>1</sup> College of Pharmacy, Natural Products Research Institute, Seoul National University, Seoul 08826, Korea; jiyunkr0@naver.com (J.Y.L.); dskim0719@snu.ac.kr (D.K.); dawkayzinkyaw@gmail.com (K.Z.K.); 18502407040@163.com (R.H.)

<sup>2</sup> The Key Laboratory of Chemistry for Natural Products of Guizhou Province and Chinese Academy of Sciences, Guiyang 550014, China; 2018087@stu.gzy.edu.cn

<sup>3</sup> State Key Laboratory for Functions and Applications of Medicinal Plants, Guizhou Medical University, Guiyang 550014, China

\* Correspondence: yhfan@gzcnpcn (Y.F.); sklee61@snu.ac.kr (S.K.L.); Tel.: +82-2-880-2475 (S.K.L.)

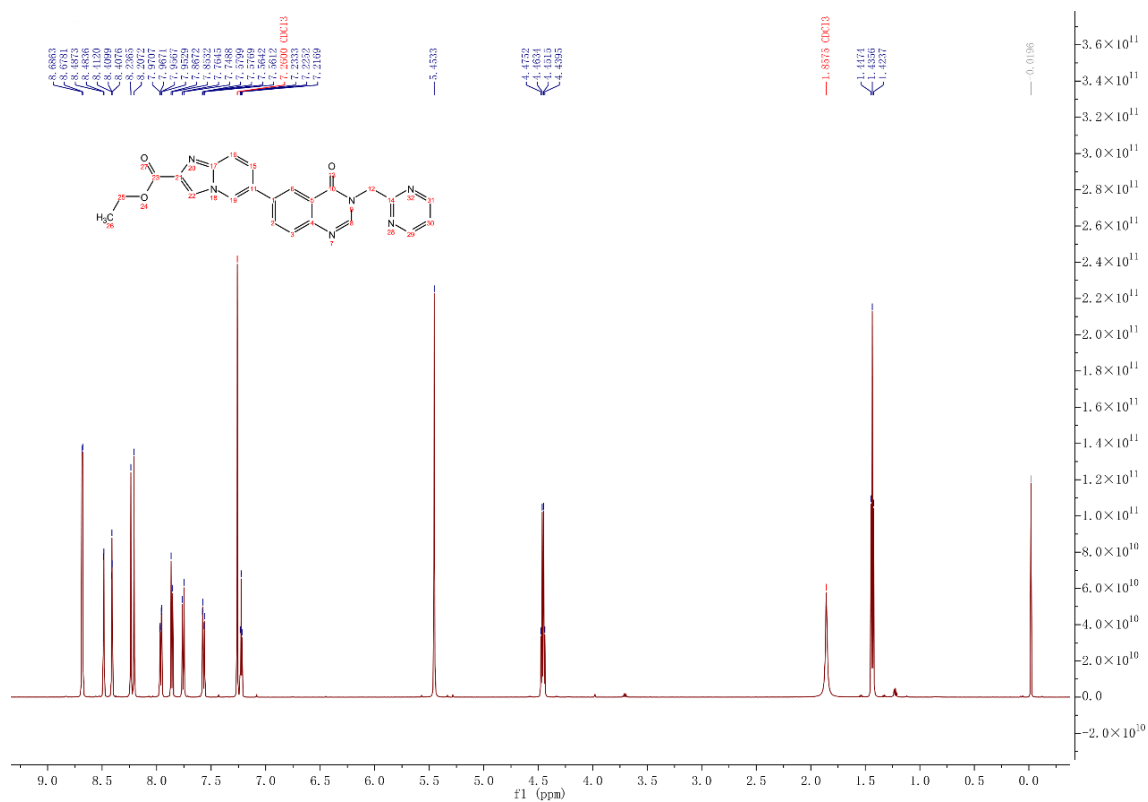

**Figure S1. <sup>1</sup>H-NMR spectra**

<sup>1</sup>H-NMR (600 MHz, CDCl<sub>3</sub>) δ 8.68 (d, *J* = 4.9 Hz, 2H), 8.49 (d, *J* = 2.2 Hz, 1H), 8.41 (d, *J* = 1.8 Hz, 1H), 8.24 (s, 1H), 8.21 (s, 1H), 7.96 (dd, *J* = 2.2, 8.4 Hz, 1H), 7.86 (d, *J* = 8.4 Hz, 1H), 7.76 (d, *J* = 9.4 Hz, 1H), 7.57 (dd, *J* = 1.8 Hz, 9.4 Hz, 1H), 7.23 (t, *J* = 4.9 Hz, 9.4 Hz, 1H), 5.45 (s, 2H), 4.46 (q, *J* = 7.1, 2H), 1.44 (t, *J* = 7.1 Hz, 3H).

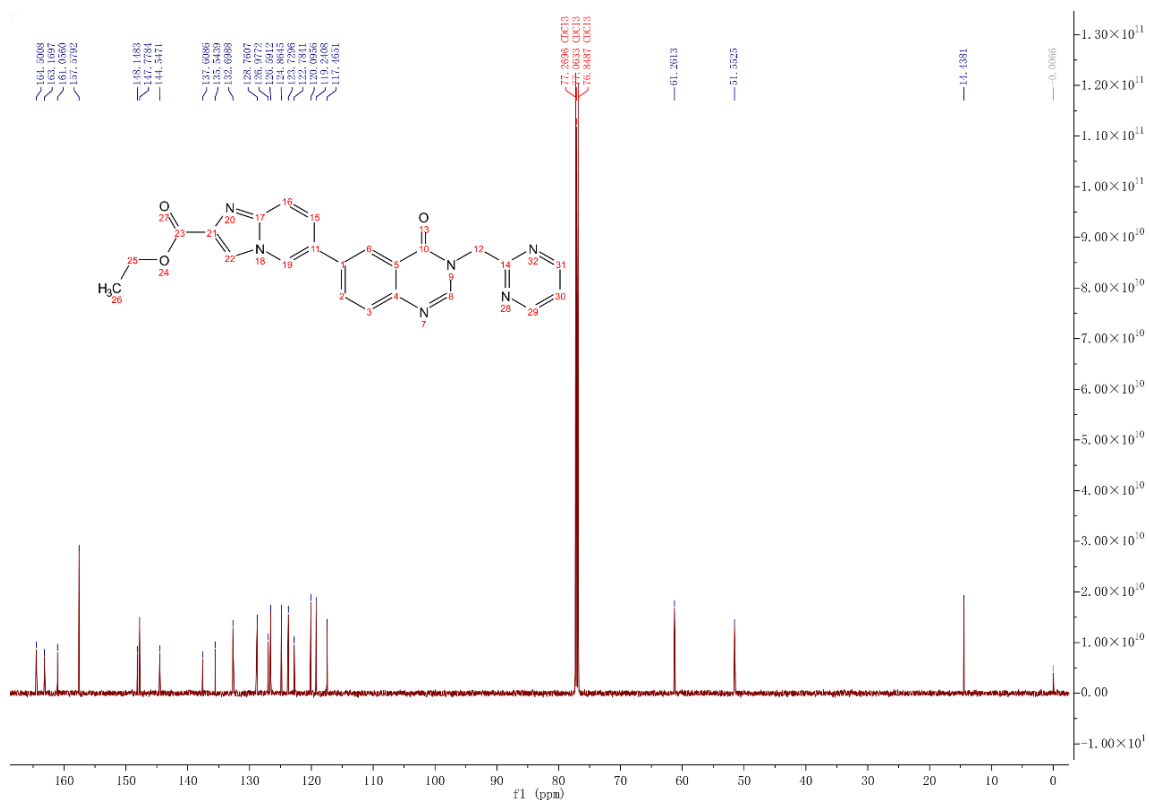

**Figure S2. <sup>13</sup>C-NMR spectra**

<sup>13</sup>C-NMR (151 MHz, CDCl<sub>3</sub>) δ 164.50, 163.17, 161.06, 157.58, 148.15, 147.78, 144.54, 137.61, 135.54, 132.70, 128.76, 126.98, 126.59, 125.0, 123.8, 122.9, 120.2, 119.3, 117.6, 61.4, 51.7, 14.5.

BHQO-19 RT: 0.11 AV: 1 NL: 3.88E8  
T: FTMS + p ESI Full ms [120.0000-1300.0000]

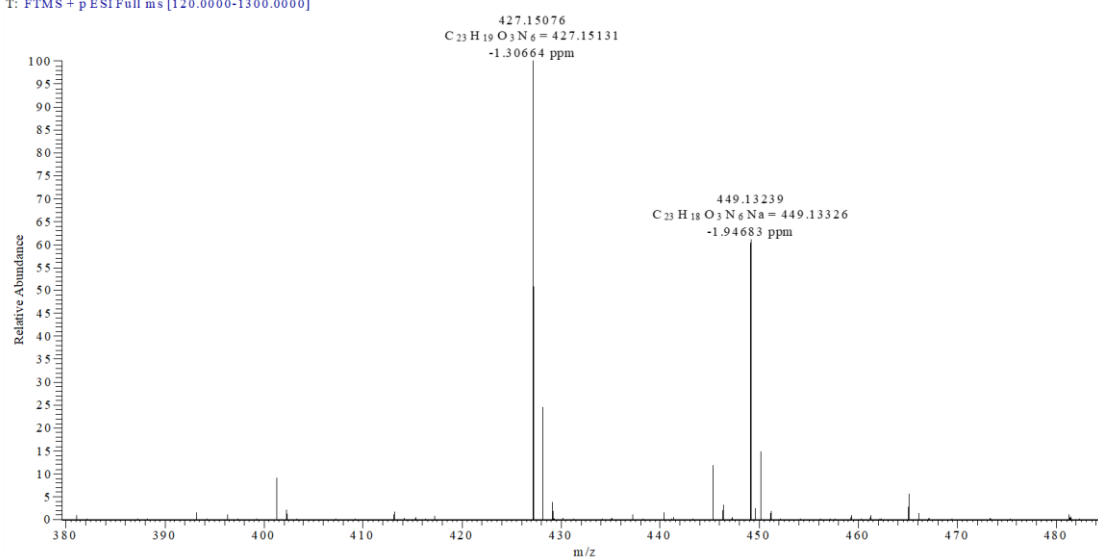

**Figure S3. High resolution mass spectra**

HRMS (ESI-QTOF) m/z Calcd. For  $C_{23}H_{19}O_3N_6$   $[M+Na]^+$  m/z: 449.1333, found: 449.1324.
